# Supplementary material for: Silicon amendment induces synergistic plant defense mechanism against pink stem borer (Sesamia inferens Walker.) in finger millet (Eleusine coracana Gaertn.)
Source: PubMed Central journal article supplement (PMC7060215; doi:10.1038/s41598-020-61182-0), 2020-03-06
Supplement: 41598_2020_61182_MOESM1_ESM.pdf [file 41598_2020_61182_MOESM1_ESM.pdf]

**Silicon amendment induces synergistic plant defense mechanism against pink stem borer (*Sesamia inferens* Walker.) in finger millet (*Eleusine coracana* Gaertn.)**

Kundansing Rajpalsing Jadhao<sup>1\*</sup>, Anuradha Bansal<sup>2\*\*</sup> and Gyana R. Rout<sup>1\*\*\*+</sup>

<sup>1</sup> Department of Agricultural Biotechnology, College of Agriculture, Odisha University of Agriculture & Technology, Bhubaneswar-751003, Odisha, India.

<sup>2</sup> Biointeractions and Crop Protection, Rothamsted Research, West Common, Harpenden, Hertfordshire, AL5 2JQ, United Kingdom

<sup>1\*</sup> [kjadhao1987@gmail.com](mailto:kjadhao1987@gmail.com)/<sup>\*\*\*</sup> [grrout@rediffmail.com](mailto:grrout@rediffmail.com), <sup>2\*\*</sup> [anu.bansal@rothamsted.ac.uk](mailto:anu.bansal@rothamsted.ac.uk)

<sup>+</sup>corresponding author

## Supplementary Figures

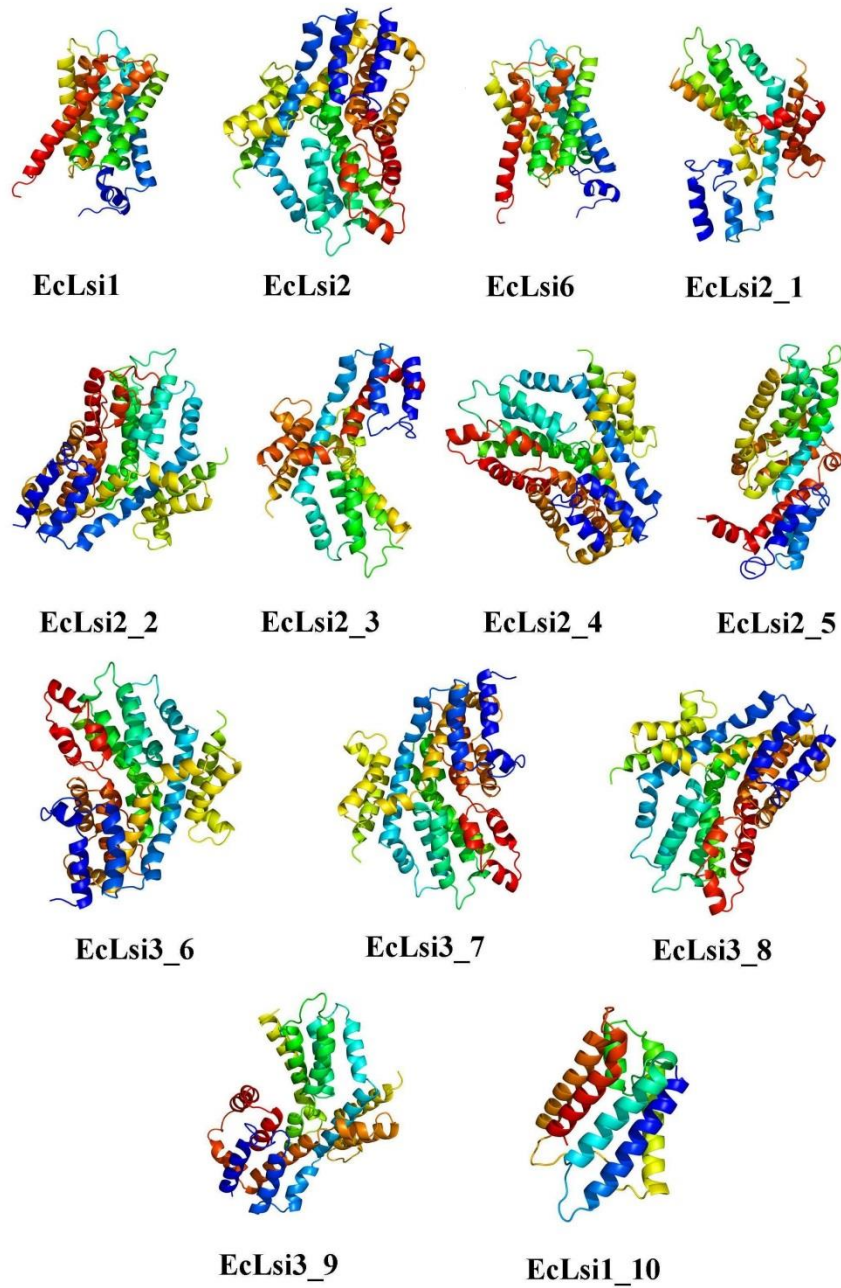

**Fig S1.** Tertiary (3D) protein structure of finger millet silicon transporter proteins depicted by Phyre2 server based on homology modeling. Models were visualized by rainbow color from N to C terminus.

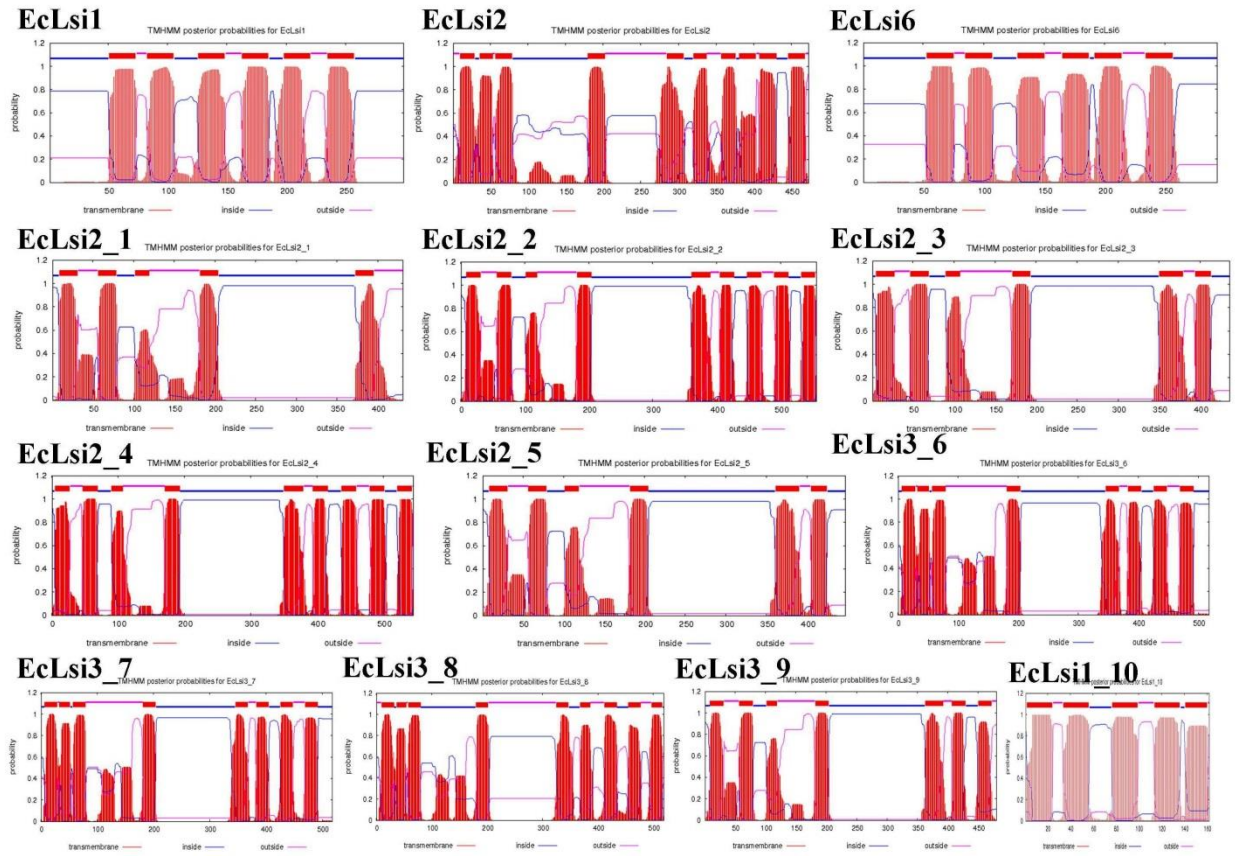

**Fig S2.** Transmembrane domains in finger millet silicon transporter proteins identified using TMHMM server.

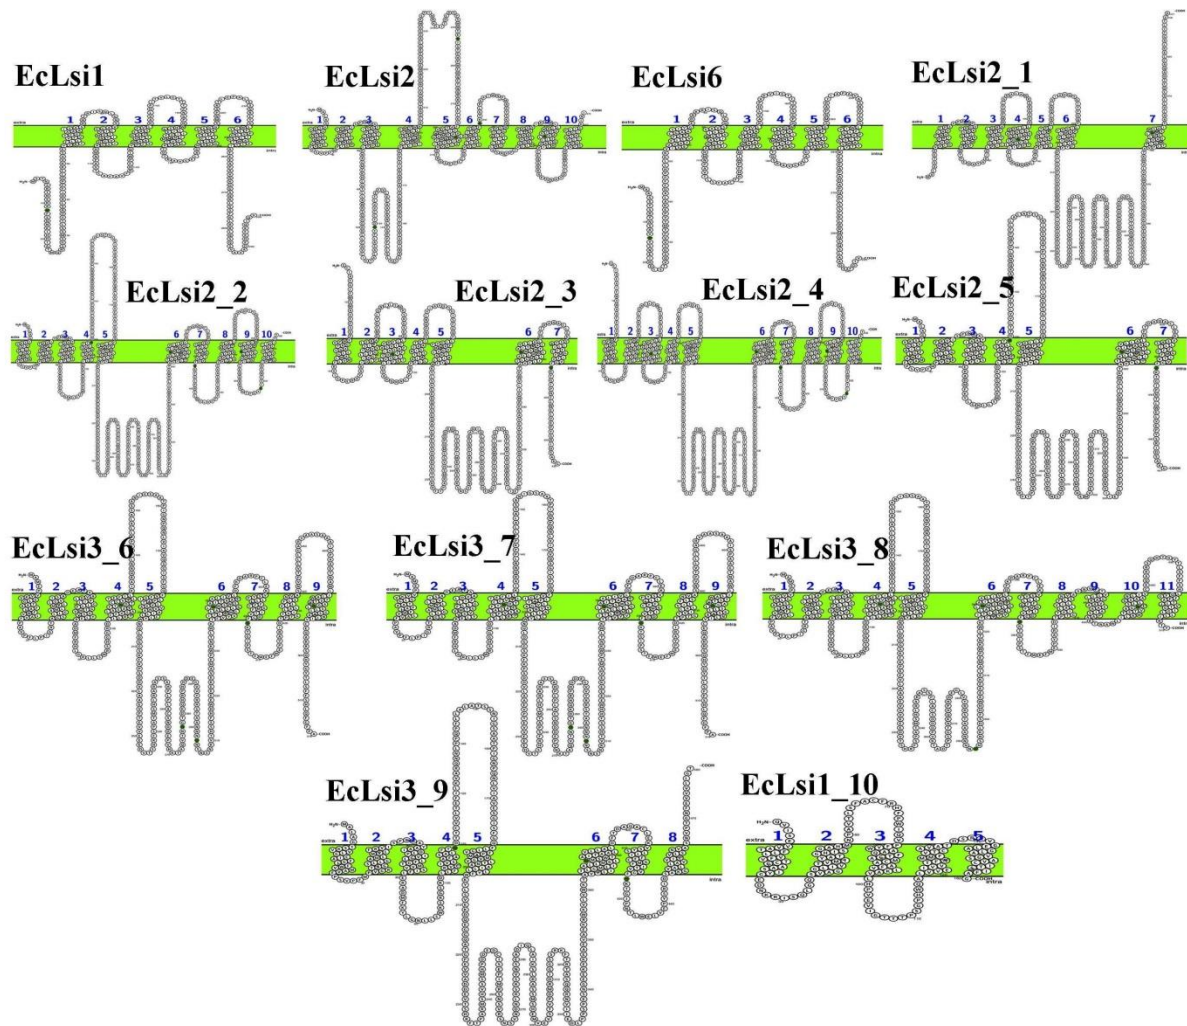

**Fig S3.** Topology of transmembrane domains of finger millet silicon transporter proteins depicted using Protter server.

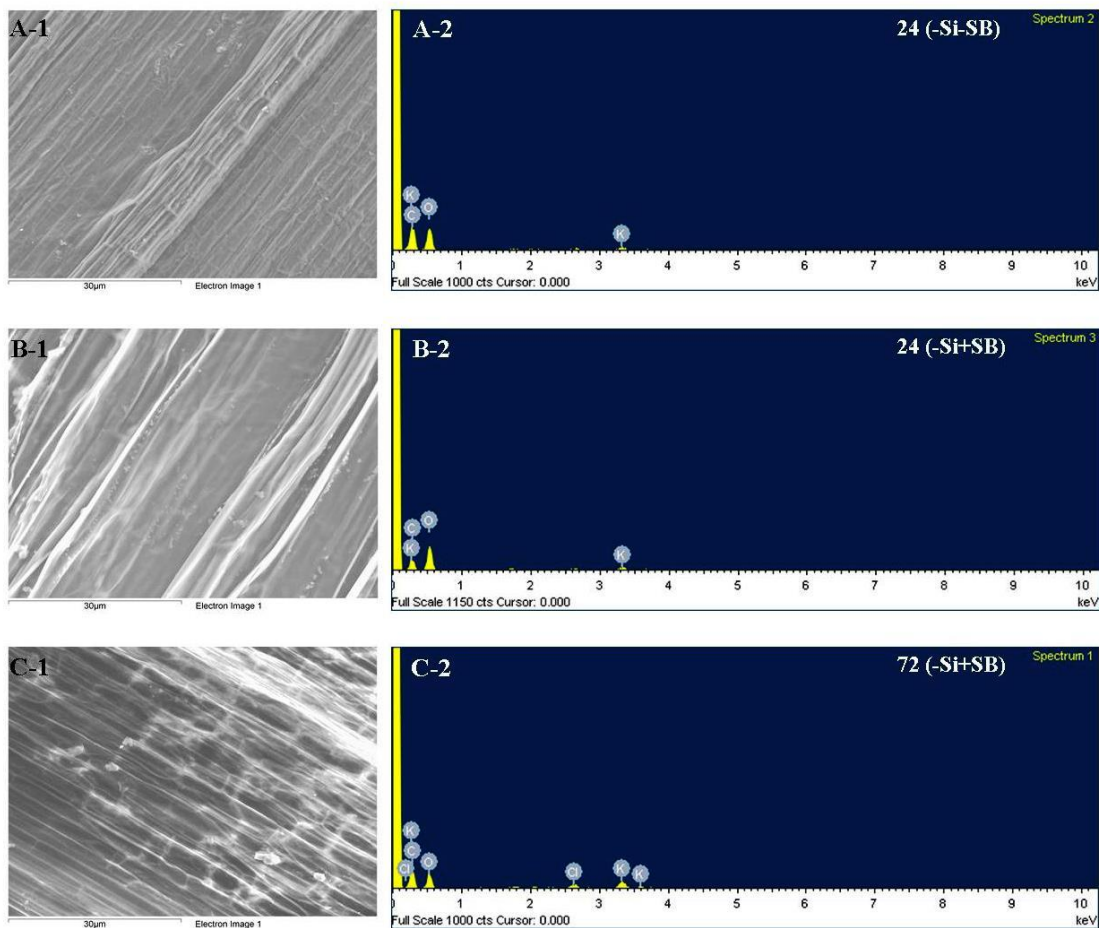

**Fig S4.** Scanning electron microscope image (250x, Bar = 30μm) (A-1 to C-1) and energy dispersive X-ray (EDX) (B-2 to C-2). Silica cell mapping of ragi leaf sheath surface of “Suvra” variety at 24 and 72 hpi without Si addition (control).

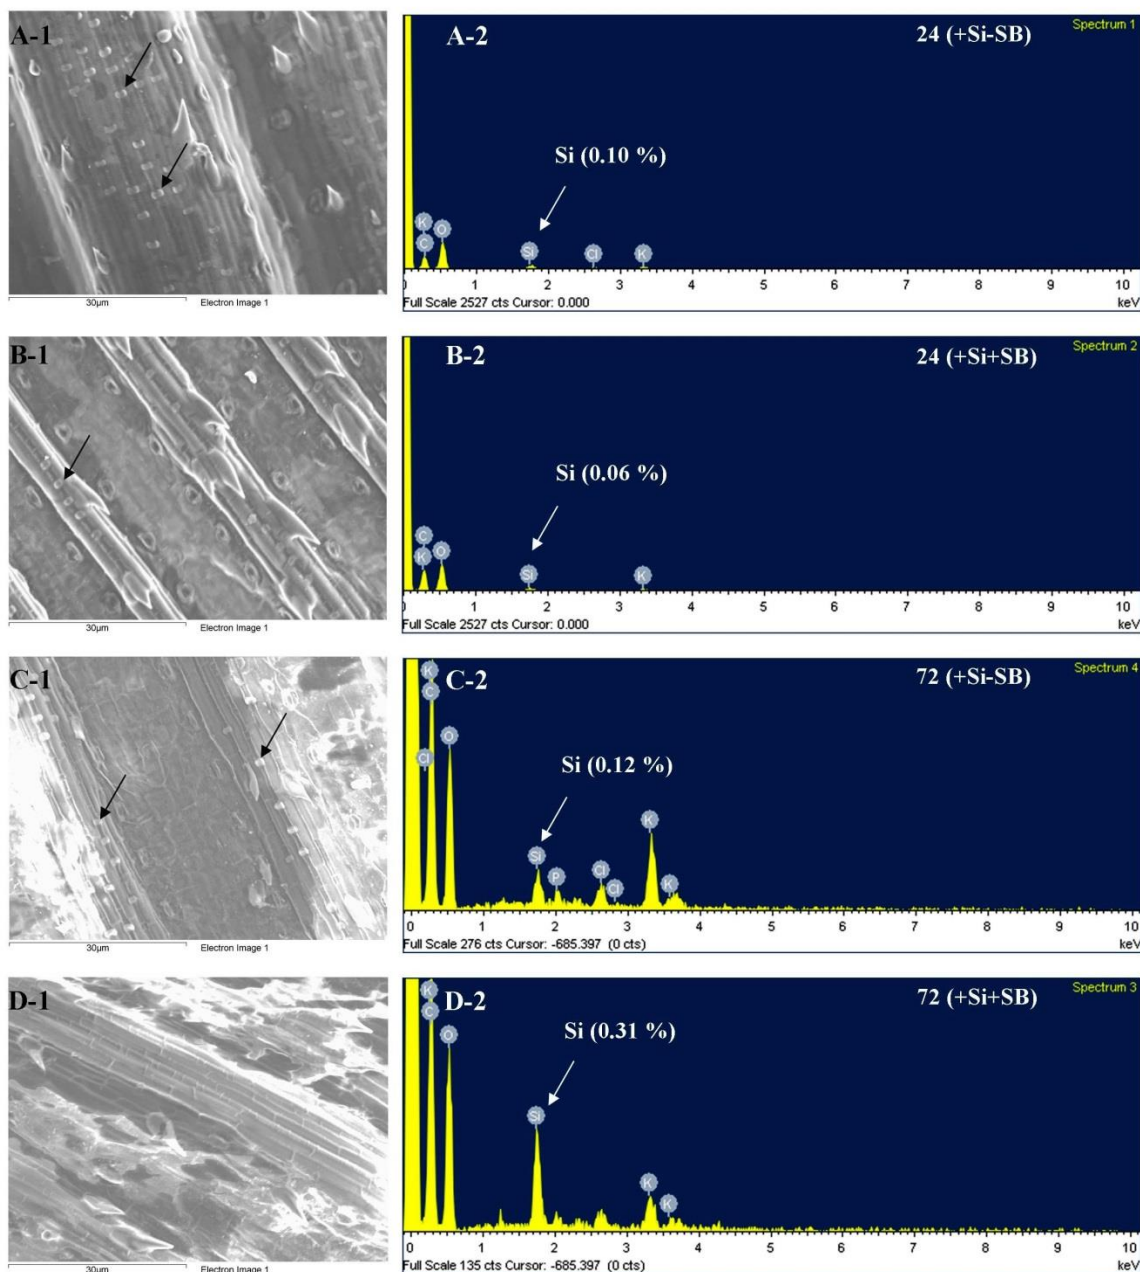

**Fig S5.** Scanning electron microscope image (250x, Bar = 30 $\mu$ m) (A-1 to D-1) and energy dispersive X-ray (EDX) (A-2 to D-2). Black arrow indicates the silica cell (dumbbell shape). White arrow denotes percent silicon mapped on ragi leaf sheath surface of “Suvra” variety at 24 and 72 hpi in Si-treated plants. (A-1 and 2): 24 hpi, with silicon and without SB infestation (+Si-SB). (B-1 and 2): 24 hpi, with silicon and SB infestation (+Si+SB). (C-1 and 2): 72 hpi, with silicon and without SB infestation (+Si-SB). (D-1 and 2): 72 hpi, with silicon and SB infestation (+Si+SB). Values in percent are means  $\pm$  SD (n=3).

## Supplementary Tables

**Table S1.** The sequences of silicon transporter genes specific primers designed from conserved sequences and their characteristics predicted by Primer 3 tool.

| Primer Code | Based on conserved & Degenerate sequence primers (5'-3') | Length | Tm    | GC%   | Self | Self3 | Primer site | Product length | Total CDS length |
|-------------|----------------------------------------------------------|--------|-------|-------|------|-------|-------------|----------------|------------------|
| Lsi1-F1     | TCGAGATCGAACTCCAGGGC                                     | 20     | 61.38 | 60.00 | 8.00 | 2.00  | start 12    | 893 bps        | 913 bps          |
| Lsi1-R1     | CAGACGGGGATGTGGTTCGAG                                    | 20     | 62.28 | 65.00 | 4.00 | 2.00  | End 912     |                |                  |
| Lsi1-F2     | TCGAGGTCGAACTCCAGGG                                      | 19     | 60.68 | 63.16 | 8.00 | 2.00  | Start 12    |                |                  |
| Lsi1-R2     | CACACTTGGATGTGGTTCGAG                                    | 20     | 58.57 | 55.00 | 4.00 | 2.00  | End 912     |                |                  |
| Lsi2-F1     | GCTCGCGTCTCTCCCAAGG                                      | 20     | 65.00 | 70.00 | 4.00 | 2.00  | Start 9     | 1412 bps       | 1473 bps         |
| Lsi2-F1     | GCTCTTGCTTCTGTGGCCAAGG                                   | 22     | 64.21 | 59.09 | 6.00 | 4.00  | Start 7     |                |                  |
| Lsi2-R1     | TTCCGATGAGGGGGATGCCG                                     | 20     | 64.20 | 65.00 | 4.00 | 2.00  | End 1463    |                |                  |
| Lsi6-F1     | GAACTACTCGAACGAGATCC                                     | 20     | 55.16 | 50.00 | 6.00 | 2.00  | Start 45    | 806 bps        | 912 bps          |
| Lsi6-R1     | GGAGCTTGAAGGAGGAGAG                                      | 19     | 56.53 | 57.89 | 5.00 | 0.00  | End 856     |                |                  |

**Table S2.** Completeness results of queried genes assemble by BUSCO tool

|                                                                |                                           |
|----------------------------------------------------------------|-------------------------------------------|
| <b>Total number of core genes queried</b>                      | 1440                                      |
| <b>Number of core genes detected</b>                           |                                           |
| <b>Complete</b>                                                | 1117 (77.57%)                             |
| <b>Complete + Partial</b>                                      | 1272 (88.33%)                             |
| <b>Number of missing core genes</b>                            | 168 (11.67%)                              |
| <b>Average number of orthologs per core genes</b>              | 1.67                                      |
| <b>% of detected core genes that have more than 1 ortholog</b> | 48.61                                     |
| <b>Scores in BUSCO format</b>                                  | C:77.6% [S:39.9%,D:37.7%],F:10.8%,M:11.6% |



**Table S3.** List of variant silicon transporter genes identified after transcriptome assembly based homology by BLSTX search tool.

| <b>Trinity contigs</b>   | <b>NCBI Genes</b> | <b>Similarity %</b> | <b>E-value</b> | <b>Gene Name</b>                               |
|--------------------------|-------------------|---------------------|----------------|------------------------------------------------|
| Contig1692               | XP_025793174.1    | 83.409              | 0              | Silicon efflux transporter (EcLsi2_1)          |
| Contig4561               | XP_004985708.1    | 94.255              | 0              | Silicon efflux transporter (EcLsi2_2)          |
| Contig4562               | XP_004985708.1    | 93.593              | 0              | Silicon efflux transporter (EcLsi2_3)          |
| Contig4563               | XP_004985708.1    | 94.139              | 0              | Silicon efflux transporter (EcLsi2_4)          |
| Contig4564               | XP_004985708.1    | 93.75               | 0              | Silicon efflux transporter (EcLsi2_5)          |
| TRINITY_DN41810_c0_g2_i2 | XP_025817714.1    | 81.308              | 0              | Silicon efflux transporter (EcLsi3_6)          |
| TRINITY_DN41810_c0_g2_i3 | XP_025817714.1    | 81.308              | 0              | Silicon efflux transporter (EcLsi3_7)          |
| TRINITY_DN41810_c0_g2_i5 | XP_025817714.1    | 81.215              | 0              | Silicon efflux transporter (EcLsi3_8)          |
| TRINITY_DN44756_c0_g1_i1 | XP_025791399.1    | 92.917              | 0              | Silicon efflux transporter (EcLsi3_9)          |
| TRINITY_DN41741_c0_g1_i7 | BAG54792.1        | 93.21               | 1E-105         | NOD26-like major intrinsic protein (EcLsi1_10) |

**Table S4.** Details of serine phosphorylation sites detected in finger millet silicon transporter proteins. The Z score was estimated by an artificial neural network method phosphorylation prediction using NetPhos 2.0 Server (<http://www.cbs.dtu.dk>)

| Gene_ID  | Protein Size | Phosphorylation sites | Serine Position | Sequence   | Z score |
|----------|--------------|-----------------------|-----------------|------------|---------|
| EcLsi1   | 299          | 9                     | 5               | MSTNSRTNS  | 0.778   |
|          |              |                       | 9               | SRTNSRANF  | 0.660   |
|          |              |                       | 29              | QNSGSMSSL  | 0.709   |
|          |              |                       | 72              | AAAISASDQ  | 0.985   |
|          |              |                       | 80              | QTRISQLGQ  | 0.978   |
|          |              |                       | 217             | VSGGSMNPA  | 0.517   |
|          |              |                       | 270             | NKDGSQKLS  | 0.965   |
|          |              |                       | 275             | QKLSSFKLR  | 0.942   |
|          |              |                       | 283             | RRLQSQSV A | 0.717   |
| EcLsi2   | 473          | 6                     | 53              | FHVISPDDA  | 0.992   |
|          |              |                       | 234             | GVMKSPINN  | 0.970   |
|          |              |                       | 246             | TDCDSPSMM  | 0.964   |
|          |              |                       | 255             | TENISTKHP  | 0.867   |
|          |              |                       | 355             | MAPYSKVNS  | 0.557   |
|          |              |                       | 359             | SKVNSVGGI  | 0.738   |
| EcLsi6   | 293          | 9                     | 5               | MAASSTSRT  | 0.694   |
|          |              |                       | 7               | ASSTSRTNS  | 0.985   |
|          |              |                       | 11              | SRTNSRVNY  | 0.988   |
|          |              |                       | 16              | RVNYSNEIH  | 0.820   |
|          |              |                       | 29              | VQSGSVVPT  | 0.747   |
|          |              |                       | 72              | CGAASIYGE  | 0.971   |
|          |              |                       | 82              | NKRISQLGQ  | 0.992   |
|          |              |                       | 219             | VSGGSMNPA  | 0.539   |
|          |              |                       | 274             | QKLSSFKLR  | 0.864   |
| EcLsi2_1 | 431          | 15                    | 241             | DEVASHRFT  | 0.988   |
|          |              |                       | 250             | PARMSHASS  | 0.991   |
|          |              |                       | 254             | SHASSFNGG  | 0.676   |
|          |              |                       | 269             | PMRRSDSMN  | 0.960   |
|          |              |                       | 271             | RRSDSMNSR  | 0.971   |
|          |              |                       | 282             | VDTMSMRSR  | 0.791   |
|          |              |                       | 285             | MSMRSRSYN  | 0.810   |
|          |              |                       | 287             | MRSRSYNSE  | 0.976   |
|          |              |                       | 290             | RSYNSEGDI  | 0.994   |
|          |              |                       | 304             | SMRASTMSQ  | 0.995   |
|          |              |                       | 307             | ASTMSQEMV  | 0.985   |
|          |              |                       | 314             | MVEVSTVSD  | 0.522   |
|          |              |                       | 317             | VSTVSDRRD  | 0.993   |
| 338      | TRTTSHQRS    | 0.994                 |                 |            |         |
| 342      | SHQRSVIE     | 0.973                 |                 |            |         |
| EcLsi2_2 | 556          | 22                    | 53              | FRVISPEDA  | 0.997   |
|          |              |                       | 99              | KSRGSKDLL  | 0.690   |
|          |              |                       | 208             | WKYLSVEKD  | 0.848   |
|          |              |                       | 231             | DEVTSHRFT  | 0.992   |
|          |              |                       | 240             | PARMSHVSS  | 0.990   |
|          |              |                       | 243             | MSHVSSMHP  | 0.677   |

|          |     |    |     |           |       |
|----------|-----|----|-----|-----------|-------|
|          |     |    | 244 | SHVSSMHPD | 0.954 |
|          |     |    | 262 | MRSNSVRSN | 0.996 |
|          |     |    | 265 | NSVRSNSVN | 0.943 |
|          |     |    | 267 | VRSNSVNDN | 0.997 |
|          |     |    | 276 | LRSRVNSE  | 0.851 |
|          |     |    | 279 | RSVNSEADI | 0.976 |
|          |     |    | 293 | SLRASSMSH | 0.994 |
|          |     |    | 294 | LRASSMSHE | 0.982 |
|          |     |    | 296 | ASSMSHEMV | 0.993 |
|          |     |    | 314 | DIGGSSRK  | 0.654 |
|          |     |    | 315 | IGGSSRKFT | 0.993 |
|          |     |    | 323 | TRTASQQRN | 0.975 |
|          |     |    | 336 | DLPPSPESN | 0.995 |
|          |     |    | 339 | PSPESNGEE | 0.991 |
|          |     |    | 440 | VEPYSRIDS | 0.988 |
|          |     |    | 444 | SRIDSAKGV | 0.972 |
| EcLsi2_3 | 436 | 22 | 42  | FRVISPEDA | 0.997 |
|          |     |    | 88  | KSRGSKDLL | 0.690 |
|          |     |    | 197 | WKYLSVEKD | 0.848 |
|          |     |    | 220 | DEVTSHRFT | 0.992 |
|          |     |    | 229 | PARMSHVSS | 0.990 |
|          |     |    | 232 | MSHVSSMHP | 0.677 |
|          |     |    | 233 | SHVSSMHPD | 0.954 |
|          |     |    | 251 | MRSNSVRSN | 0.996 |
|          |     |    | 254 | NSVRSNSVN | 0.943 |
|          |     |    | 256 | VRSNSVNDN | 0.997 |
|          |     |    | 265 | LRSRVNSE  | 0.851 |
|          |     |    | 268 | RSVNSEADI | 0.976 |
|          |     |    | 282 | SLRASSMSH | 0.994 |
|          |     |    | 283 | LRASSMSHE | 0.982 |
|          |     |    | 285 | ASSMSHEMV | 0.993 |
|          |     |    | 303 | DIGGSSRK  | 0.654 |
|          |     |    | 304 | IGGSSRKFT | 0.993 |
|          |     |    | 312 | TRTASQQRN | 0.975 |
|          |     |    | 325 | DLPPSPESN | 0.995 |
|          |     |    | 328 | PSPESNGEE | 0.991 |
|          |     |    | 429 | VEPYSRIDS | 0.988 |
|          |     |    | 433 | SRIDSAKG- | 0.982 |
| EcLsi2_4 | 545 | 22 | 42  | FRVISPEDA | 0.997 |
|          |     |    | 88  | KSRGSKDLL | 0.690 |
|          |     |    | 197 | WKYLSVEKD | 0.848 |
|          |     |    | 220 | DEVTSHRFT | 0.992 |
|          |     |    | 229 | PARMSHVSS | 0.990 |
|          |     |    | 232 | MSHVSSMHP | 0.677 |
|          |     |    | 233 | SHVSSMHPD | 0.954 |
|          |     |    | 251 | MRSNSVRSN | 0.996 |
|          |     |    | 254 | NSVRSNSVN | 0.943 |
|          |     |    | 256 | VRSNSVNDN | 0.997 |
|          |     |    | 265 | LRSRVNSE  | 0.851 |
|          |     |    | 268 | RSVNSEADI | 0.976 |
|          |     |    | 282 | SLRASSMSH | 0.994 |

|          |     |    |     |            |       |
|----------|-----|----|-----|------------|-------|
|          |     |    | 283 | LRASSMSHE  | 0.982 |
|          |     |    | 285 | ASSMSHEMV  | 0.993 |
|          |     |    | 303 | DIGGSSRKF  | 0.654 |
|          |     |    | 304 | IGGSSRKFT  | 0.993 |
|          |     |    | 312 | TRTASQQRN  | 0.975 |
|          |     |    | 325 | DLPPSPESN  | 0.995 |
|          |     |    | 328 | PSPESNGEE  | 0.991 |
|          |     |    | 429 | VEPYSRIDS  | 0.988 |
|          |     |    | 433 | SRIDSAKGV  | 0.972 |
| EcLsi2_5 | 447 | 22 | 53  | FRVISPEDA  | 0.997 |
|          |     |    | 99  | KSRGSKDLL  | 0.690 |
|          |     |    | 208 | WKYLSVEKD  | 0.848 |
|          |     |    | 231 | DEVTSHRFT  | 0.992 |
|          |     |    | 240 | PARMSHVSS  | 0.990 |
|          |     |    | 243 | MSHVSSMHP  | 0.677 |
|          |     |    | 244 | SHVSSMHPD  | 0.954 |
|          |     |    | 262 | MRSNSVRSN  | 0.996 |
|          |     |    | 265 | NSVRSNSVN  | 0.943 |
|          |     |    | 267 | VRSNSVNDN  | 0.997 |
|          |     |    | 276 | LRSRVNSE   | 0.851 |
|          |     |    | 279 | RSVNSEADI  | 0.976 |
|          |     |    | 293 | SLRASSMSH  | 0.994 |
|          |     |    | 294 | LRASSMSHE  | 0.982 |
|          |     |    | 296 | ASSMSHEMV  | 0.993 |
|          |     |    | 314 | DIGGSSRKF  | 0.654 |
|          |     |    | 315 | IGGSSRKFT  | 0.993 |
|          |     |    | 323 | TRTASQQRN  | 0.975 |
|          |     |    | 336 | DLPPSPESN  | 0.995 |
|          |     |    | 339 | PSPESNGEE  | 0.991 |
|          |     |    | 440 | VEPYSRIDS  | 0.988 |
|          |     |    | 444 | SRIDSAKG-  | 0.982 |
| EcLsi3_6 | 518 | 8  | 93  | GRLLSWRSH  | 0.965 |
|          |     |    | 236 | EDVTSHRFS  | 0.983 |
|          |     |    | 240 | SHRFSPATM  | 0.993 |
|          |     |    | 245 | PATMSHLRA  | 0.635 |
|          |     |    | 253 | ARASSAHPL  | 0.986 |
|          |     |    | 307 | NNSNSNKVT  | 0.670 |
|          |     |    | 460 | AAAISPA AE | 0.560 |
|          |     |    | 499 | QARRSQHYG  | 0.985 |
| EcLsi3_7 | 518 | 8  | 93  | GRLLSWRSH  | 0.965 |
|          |     |    | 236 | EDVTSHRFS  | 0.983 |
|          |     |    | 240 | SHRFSPATM  | 0.993 |
|          |     |    | 245 | PATMSHLRA  | 0.635 |
|          |     |    | 253 | ARASSAHPL  | 0.986 |
|          |     |    | 307 | NNSNSNKVT  | 0.670 |
|          |     |    | 460 | AAAISPA AE | 0.560 |
|          |     |    | 499 | QARRSQHYG  | 0.985 |
| EcLsi3_8 | 519 | 9  | 93  | GRLLSWRSH  | 0.965 |
|          |     |    | 233 | EDVTSHRFS  | 0.983 |
|          |     |    | 237 | SHRFSPATM  | 0.993 |
|          |     |    | 242 | PATMSHLRA  | 0.635 |

|           |     |    |     |           |       |
|-----------|-----|----|-----|-----------|-------|
|           |     |    | 250 | ARASSPLAC | 0.980 |
|           |     |    | 255 | PLACSDDDP | 0.955 |
|           |     |    | 300 | NKLDSFHHW | 0.837 |
|           |     |    | 446 | AAAISPAAE | 0.560 |
|           |     |    | 485 | QARRSQHYG | 0.985 |
| EcLsi3_9  | 480 | 22 | 53  | FRVISPEDA | 0.997 |
|           |     |    | 99  | KSRGSKDLL | 0.690 |
|           |     |    | 208 | WKYLSVEKD | 0.848 |
|           |     |    | 231 | DEVTSHRFT | 0.992 |
|           |     |    | 240 | PARMSHVSS | 0.990 |
|           |     |    | 243 | MSHVSSMHP | 0.677 |
|           |     |    | 244 | SHVSSMHPD | 0.954 |
|           |     |    | 262 | MRSNSVRSN | 0.996 |
|           |     |    | 265 | NSVRSNSVN | 0.943 |
|           |     |    | 267 | VRSNSVNDN | 0.997 |
|           |     |    | 276 | LRRSVNSE  | 0.851 |
|           |     |    | 279 | RSVNSEADI | 0.976 |
|           |     |    | 293 | SLRASSMSH | 0.994 |
|           |     |    | 294 | LRASSMSHE | 0.982 |
|           |     |    | 296 | ASSMSHEMV | 0.993 |
|           |     |    | 314 | DIGGSSRKF | 0.654 |
|           |     |    | 315 | IGGSSRKFT | 0.993 |
|           |     |    | 323 | TRTASQQRN | 0.975 |
|           |     |    | 336 | DLPPSPESN | 0.995 |
|           |     |    | 339 | PSPESNGEE | 0.991 |
|           |     |    | 442 | VEPYSRIDS | 0.988 |
|           |     |    | 446 | SRIDSAKGV | 0.972 |
| EcLsi1_10 | 162 | 2  | 21  | CGAASIYGE | 0.971 |
|           |     |    | 31  | NKRISQLGQ | 0.992 |

**Table S5.** Details of predicted sub-cellular location of finger millet silicon transporter proteins predicted by using Wolfpsort, Cello and TargetP servers.

| <b>Gene_ID</b> | <b>Wolfpsort<sup>1</sup></b> | <b>Cello<sup>2</sup></b> | <b>TargetP<sup>3</sup></b> |
|----------------|------------------------------|--------------------------|----------------------------|
| EcLsi1         | plasma membrane              | plasma membrane          | Any other                  |
| EcLsi2         | plasma membrane              | plasma membrane          | Secretory                  |
| EcLsi6         | Endoplasmic reticulum        | plasma membrane          | Any other                  |
| EcLsi2_1       | plasma membrane              | plasma membrane          | Secretory                  |
| EcLsi2_2       | plasma membrane              | plasma membrane          | Secretory                  |
| EcLsi2_3       | plasma membrane              | plasma membrane          | Secretory                  |
| EcLsi2_4       | plasma membrane              | plasma membrane          | Secretory                  |
| EcLsi2_5       | plasma membrane              | plasma membrane          | Secretory                  |
| EcLsi3_6       | plasma membrane              | plasma membrane          | Secretory                  |
| EcLsi3_7       | plasma membrane              | plasma membrane          | Secretory                  |
| EcLsi3_8       | plasma membrane              | plasma membrane          | Secretory                  |
| EcLsi3_9       | plasma membrane              | plasma membrane          | Secretory                  |
| EcLsi1_10      | Vacuole                      | plasma membrane          | Secretory                  |

<sup>1</sup><http://wolfpsort.org/>, <sup>2</sup><http://cello.life.nctu.edu.tw>, <sup>3</sup>[www.cbs.dtu.dk/services/TargetP](http://www.cbs.dtu.dk/services/TargetP),

**Table S6.** Primer sequences and their characteristics designed for qRT-PCR analysis of silicon transporter genes predicted by Primer 3 tool.

| <b>Primer</b> | <b>sequence primers (5'-3')</b> | <b>Length</b> | <b>Start</b> | <b>Stop</b> | <b>Tm</b> | <b>GC%</b> | <b>Self</b> | <b>Self3</b> | <b>product</b> |
|---------------|---------------------------------|---------------|--------------|-------------|-----------|------------|-------------|--------------|----------------|
| qLsi2-F       | GCTCTTCACCAACGACACCT            | 20            | 345          | 364         | 60.25     | 55.00      | 2.00        | 0.00         | 169bps         |
| qLsi2-R       | GAAGGCGATGACGAGGTTC             | 20            | 513          | 494         | 59.83     | 55.00      | 3.00        | 1.00         |                |
| qLsi1-F       | CACTGGCACTCTCTGCTCAT            | 20            | 487          | 506         | 59.75     | 55.00      | 3.00        | 2.00         | 172bps         |
| qLsi1-R       | GGTTCATCGATCCTCCTGAA            | 20            | 658          | 639         | 56.72     | 50.00      | 6.00        | 3.00         |                |
| qLsi6-F       | CGTCCCCACCATGTATTACC            | 20            | 90           | 109         | 57.75     | 55.00      | 5.00        | 3.00         | 204bps         |
| qLsi6-R       | ATCATGACGGTGACGATGAG            | 20            | 293          | 274         | 57.50     | 50.00      | 7.00        | 1.00         |                |

**Table S7.** Primer sequences and their characteristics designed for qRT-PCR analysis of genes involved in defense hormone regulation predicted by Primer 3 tool.

| Primer Code                | qRT-PCR Primers (5'-3') | Primer Length | Tm    | GC%   | Self | Self3 | Start | Stop | Primers designed from | Product Length |
|----------------------------|-------------------------|---------------|-------|-------|------|-------|-------|------|-----------------------|----------------|
| Primers for Salicylic acid |                         |               |       |       |      |       |       |      |                       |                |
| PAL-F                      | CCATCGAGCGCGAGGTCAAC    | 20            | 63.80 | 65.00 | 6.00 | 2.00  | -     | -    | Conserved sequences   | 266 bps        |
| PAL-R                      | GGCGATCTCGGTGCCCTTG     | 19            | 63.37 | 68.42 | 4.00 | 0.00  | -     | -    |                       |                |
| Primers for Jasmonic acid  |                         |               |       |       |      |       |       |      |                       |                |
| LOX-F                      | GTCAAGAACCACTGGAGCGA    | 20            | 59.97 | 55.00 | 5.00 | 0.00  | 355   | 374  | KF813007.2            | 147 bps        |
| LOX-R                      | GTCATTGGCGAAGACGATGC    | 20            | 59.97 | 55.00 | 6.00 | 2.00  | 501   | 482  |                       |                |
| Primers for Ethylene       |                         |               |       |       |      |       |       |      |                       |                |
| SAM-F                      | CGCAAGATCATCATCGACACC   | 21            | 59.48 | 52.38 | 6.00 | 0.00  | -     | -    | Conserved sequences   | 394 bps        |
| SAM-R                      | CCACCTCCCAGGTGAAGTC     | 19            | 59.32 | 63.16 | 7.00 | 3.00  | -     | -    |                       |                |
| Internal Control Actin     |                         |               |       |       |      |       |       |      |                       |                |
| EcActin-F                  | AAGTACCCAATCGAGCATGG    | 20            | 60.0  | 50.00 | 4.00 | 2.00  | 83    | 103  | HE800188.1            | 247 bps        |
| EcActin-R                  | CAGTTGTACGCCCACTAGCA    | 20            | 59.9  | 55.00 | 4.00 | 0.00  | 329   | 349  |                       |                |
